# Supplementary material for: Molecular cloning and characterization of PtrLAR3, a gene encoding leucoanthocyanidin reductase from Populus trichocarpa, and its constitutive expression enhances fungal resistance in transgenic plants
Source: PubMed Central journal article supplement — J Exp Bot. 2012 Jan 20;63(7):2513–24. doi: 10.1093/jxb/err425 (PMC3346219; doi:10.1093/jxb/err425), 2012-01-20
Supplement: supp_err425_00066332-file001.pdf [file supp_err425_00066332-file001.pdf]

**Molecular cloning and characterization of *PtrLAR3*, a gene encoding leucoanthocyanidin reductase from *Populus trichocarpa* and its constitutive expression enhances fungal resistance in transgenic plants**

**Authors:**

<sup>1</sup>Li Yuan, <sup>1</sup>Lijun Wang, <sup>2</sup>Zujing Han, <sup>1</sup>Yuanzhong Jiang, <sup>2</sup>Lili Zhao, <sup>1</sup>Hong Liu, <sup>1</sup>Li Yang, <sup>1</sup>Keming Luo\*

<sup>1</sup>Key Laboratory of Eco-environments of Three Gorges Reservoir Region, Ministry of Education, Institute of Resources Botany, School of Life Sciences, Southwest University, Chongqing 400715, China

<sup>2</sup>Beijing Genomics Institute-Shenzhen, Shenzhen 518083, China

**Supplementary Material**

Supplementary Table S1: Comparison of changes in expression levels of PA biosynthetic genes leading to PA accumulation following *Marssonina brunnea* f.sp. *multigermtubi* infection using digital gene expression (DGE) analysis.

| Gene ID          | Gene_length | Read count (WT) | Read count ( <i>M.brunnea</i> infection) | WT4-RPKM    | <i>M.brunnea</i> infection-RPKM | Log2 Ratio ( <i>M.brunnea</i> infection/WT) | Up-/down-regulation ( <i>M.brunnea</i> infection/WT) | P-value     |
|------------------|-------------|-----------------|------------------------------------------|-------------|---------------------------------|---------------------------------------------|------------------------------------------------------|-------------|
| POPTR_0006s12870 | 2145        | 5328            | 4264                                     | 669.5861187 | 589.910896                      | -0.182772563                                | Down                                                 | 6.54E-10    |
| POPTR_0008s03810 | 2136        | 306             | 439                                      | 38.61799306 | 60.99016248                     | 0.659303369                                 | Up                                                   | 5.95E-10    |
| POPTR_0006s12870 | 2145        | 2526            | 1262                                     | 356.5261046 | 589.910896                      | -0.182772563                                | Down                                                 | 6.54E-10    |
| POPTR_0016s09230 | 2148        | 756             | 838                                      | 94.87614725 | 115.7727262                     | 0.287178091                                 | Up                                                   | 7.13E-05    |
| POPTR_0010s23100 | 2136        | 14              | 22                                       | 1.766836284 | 3.056454612                     | 0.790690778                                 | Up                                                   | 0.10728     |
| POPTR_0019s15110 | 1518        | 583             | 321                                      | 103.5300217 | 62.75231894                     | -0.722308504                                | Down                                                 | 2.17E-13    |
| POPTR_0013s15380 | 1518        | 735             | 541                                      | 130.5224116 | 105.7601388                     | -0.303501574                                | Down                                                 | 0.000194042 |
| POPTR_0014s14200 | 1191        | 201             | 170                                      | 45.49396801 | 42.35782759                     | -0.103046673                                | Down                                                 | 0.495438    |
| POPTR_0001s14320 | 1176        | 1               | 47                                       | 0.229225116 | 11.8600646                      | 5.693202933                                 | Up                                                   | 0.000567202 |
| POPTR_0001s14310 | 1173        | 0               | 72                                       | 0.001       | 18.21507663                     | 14.15284544                                 | Up                                                   | 0           |
| POPTR_0003s17530 | 1176        | 5               | 64                                       | 1.146125578 | 16.1498752                      | 3.816685987                                 | Up                                                   | 3.48E-05    |
| POPTR_0002s03500 | 1041        | 29              | 272                                      | 7.50959975  | 77.53801754                     | 3.368095928                                 | Up                                                   | 3.81E-11    |
| POPTR_0006s08750 | 987         | 13              | 143                                      | 3.550550725 | 42.99474755                     | 3.5980457                                   | Up                                                   | 4.76E-07    |
| POPTR_0004s03030 | 1008        | 32              | 232                                      | 8.557737646 | 68.30051388                     | 2.996595077                                 | Up                                                   | 6.67E-12    |
| POPTR_0003s11900 | 1086        | 0               | 20                                       | 0.001       | 5.465082078                     | 12.41602745                                 | Up                                                   | 3.39E-07    |
| POPTR_0001s08410 | 1083        | 5               | 177                                      | 1.244546334 | 48.49995417                     | 5.284291537                                 | Up                                                   | 3.48E-05    |
| POPTR_0008s11540 | 1059        | 25              | 118                                      | 6.363756748 | 33.06606885                     | 2.377400941                                 | Up                                                   | 4.11E-10    |
| POPTR_0015s03360 | 1050        | 0               | 13                                       | 0.001       | 3.674096609                     | 11.84317385                                 | Up                                                   | 6.13E-05    |
| POPTR_0013s07050 | 1566        | 95              | 368                                      | 16.35314809 | 69.73528488                     | 2.092320429                                 | Up                                                   | 0           |
| POPTR_0010s21980 | 672         | 95              | 109                                      | 38.10867545 | 48.13419836                     | 0.336942798                                 | Up                                                   | 0.095666    |

<sup>a</sup>The gene expression level is calculated by using RPKM method (Reads Per kb per Million reads) (Mortazavi et al., 2008), and the formula is shown as follows:  $RPKM = 10^6 C/NL/10^3$ . Given RPKM(A) to be the expression of gene A, C to be number of reads that uniquely aligned to gene A, N to be total number of reads that uniquely aligned to all genes, and L to be number of bases on gene A.

A Student's *t*-test (two-sample, unpaired, one-sided) was performed to test significance (*P*) of up- or downregulation of each transcript between infected and control leaves.

**Supplementary Figure S1:** Photographs of *PtrLAR3* overexpressing *Populus tomentosa* Carr. after four weeks of growth. No phenotypic or growth differences were observed between *PtrLAR3* overexpressing and control plants under the same growth conditions.

**Supplementary Figure S2:** PCR analysis of transgenic poplar plants. Genomic DNAs were isolated from hygromycin-resistant plants transformed with the *35S:PtrLAR3* vector. PCR amplification using primers specific for the production of a 562-bp *PtrLAR3* fragment. M, D2000 DNA Ladder; WT, non-transgenic plants; P, corresponding plasmid DNA (positive control); Lanes 1–10, independent transgenic lines. Numbers on the left indicate DNA marker sizes in base pairs.

## Reference

**Mortazavi A, Williams BA, McCue K, Schaeffer L, Wold B.** 2008 Mapping and quantifying mammalian transcriptomes by RNA-Seq. *Nature Methods* 5, 621-628.

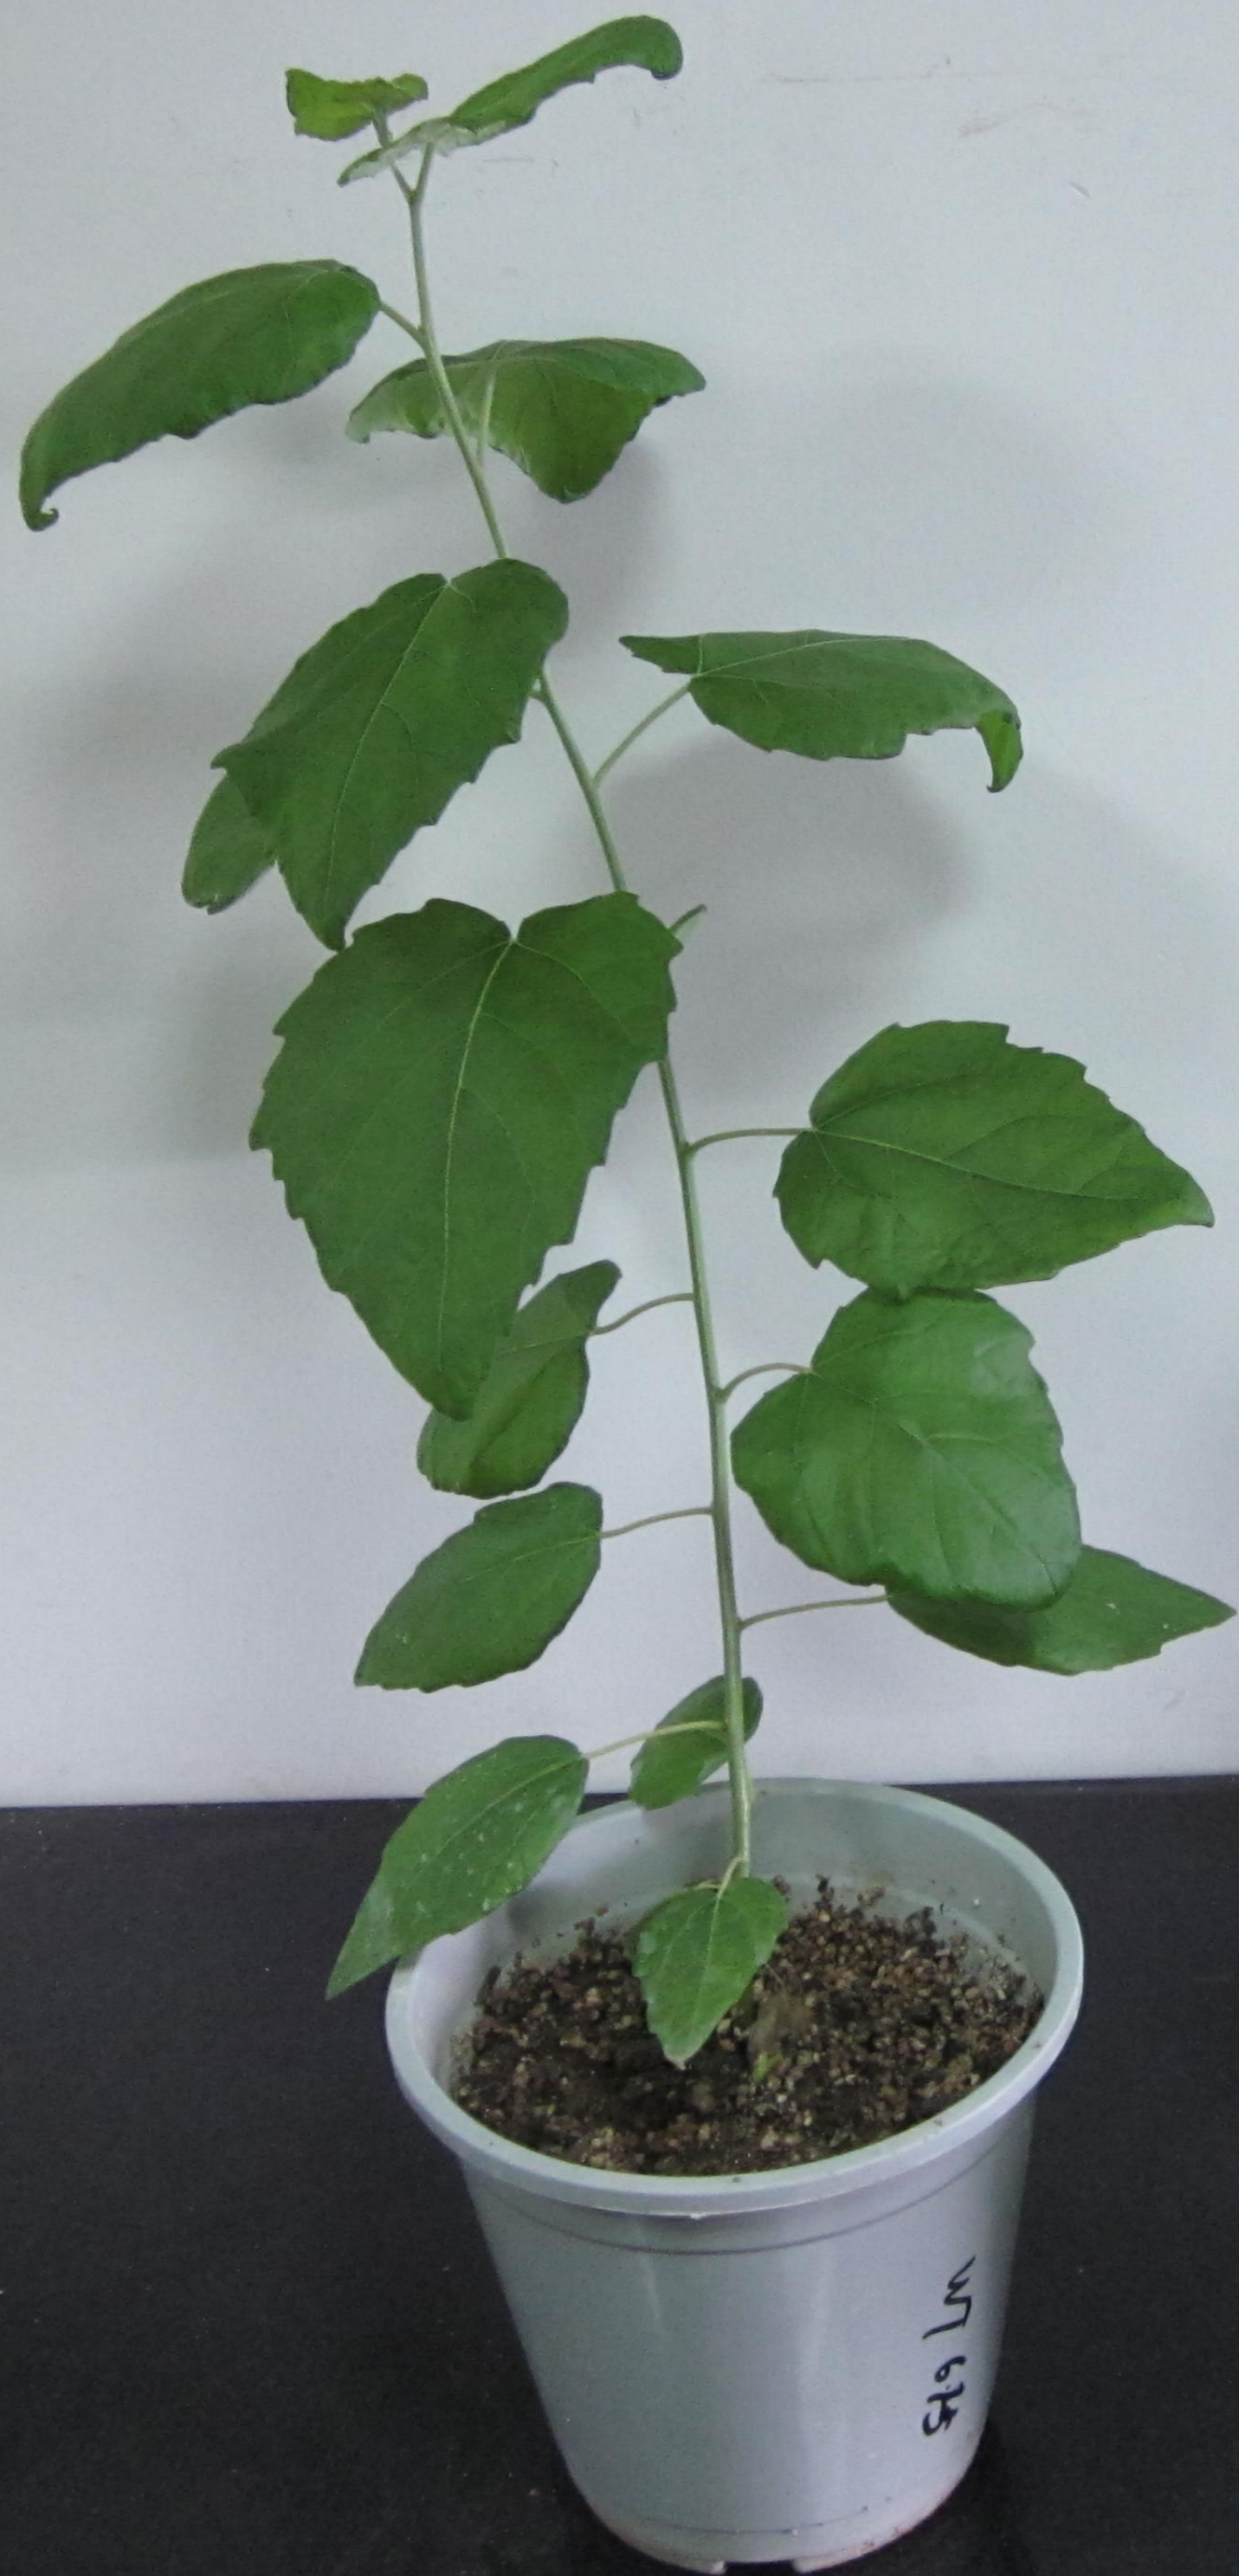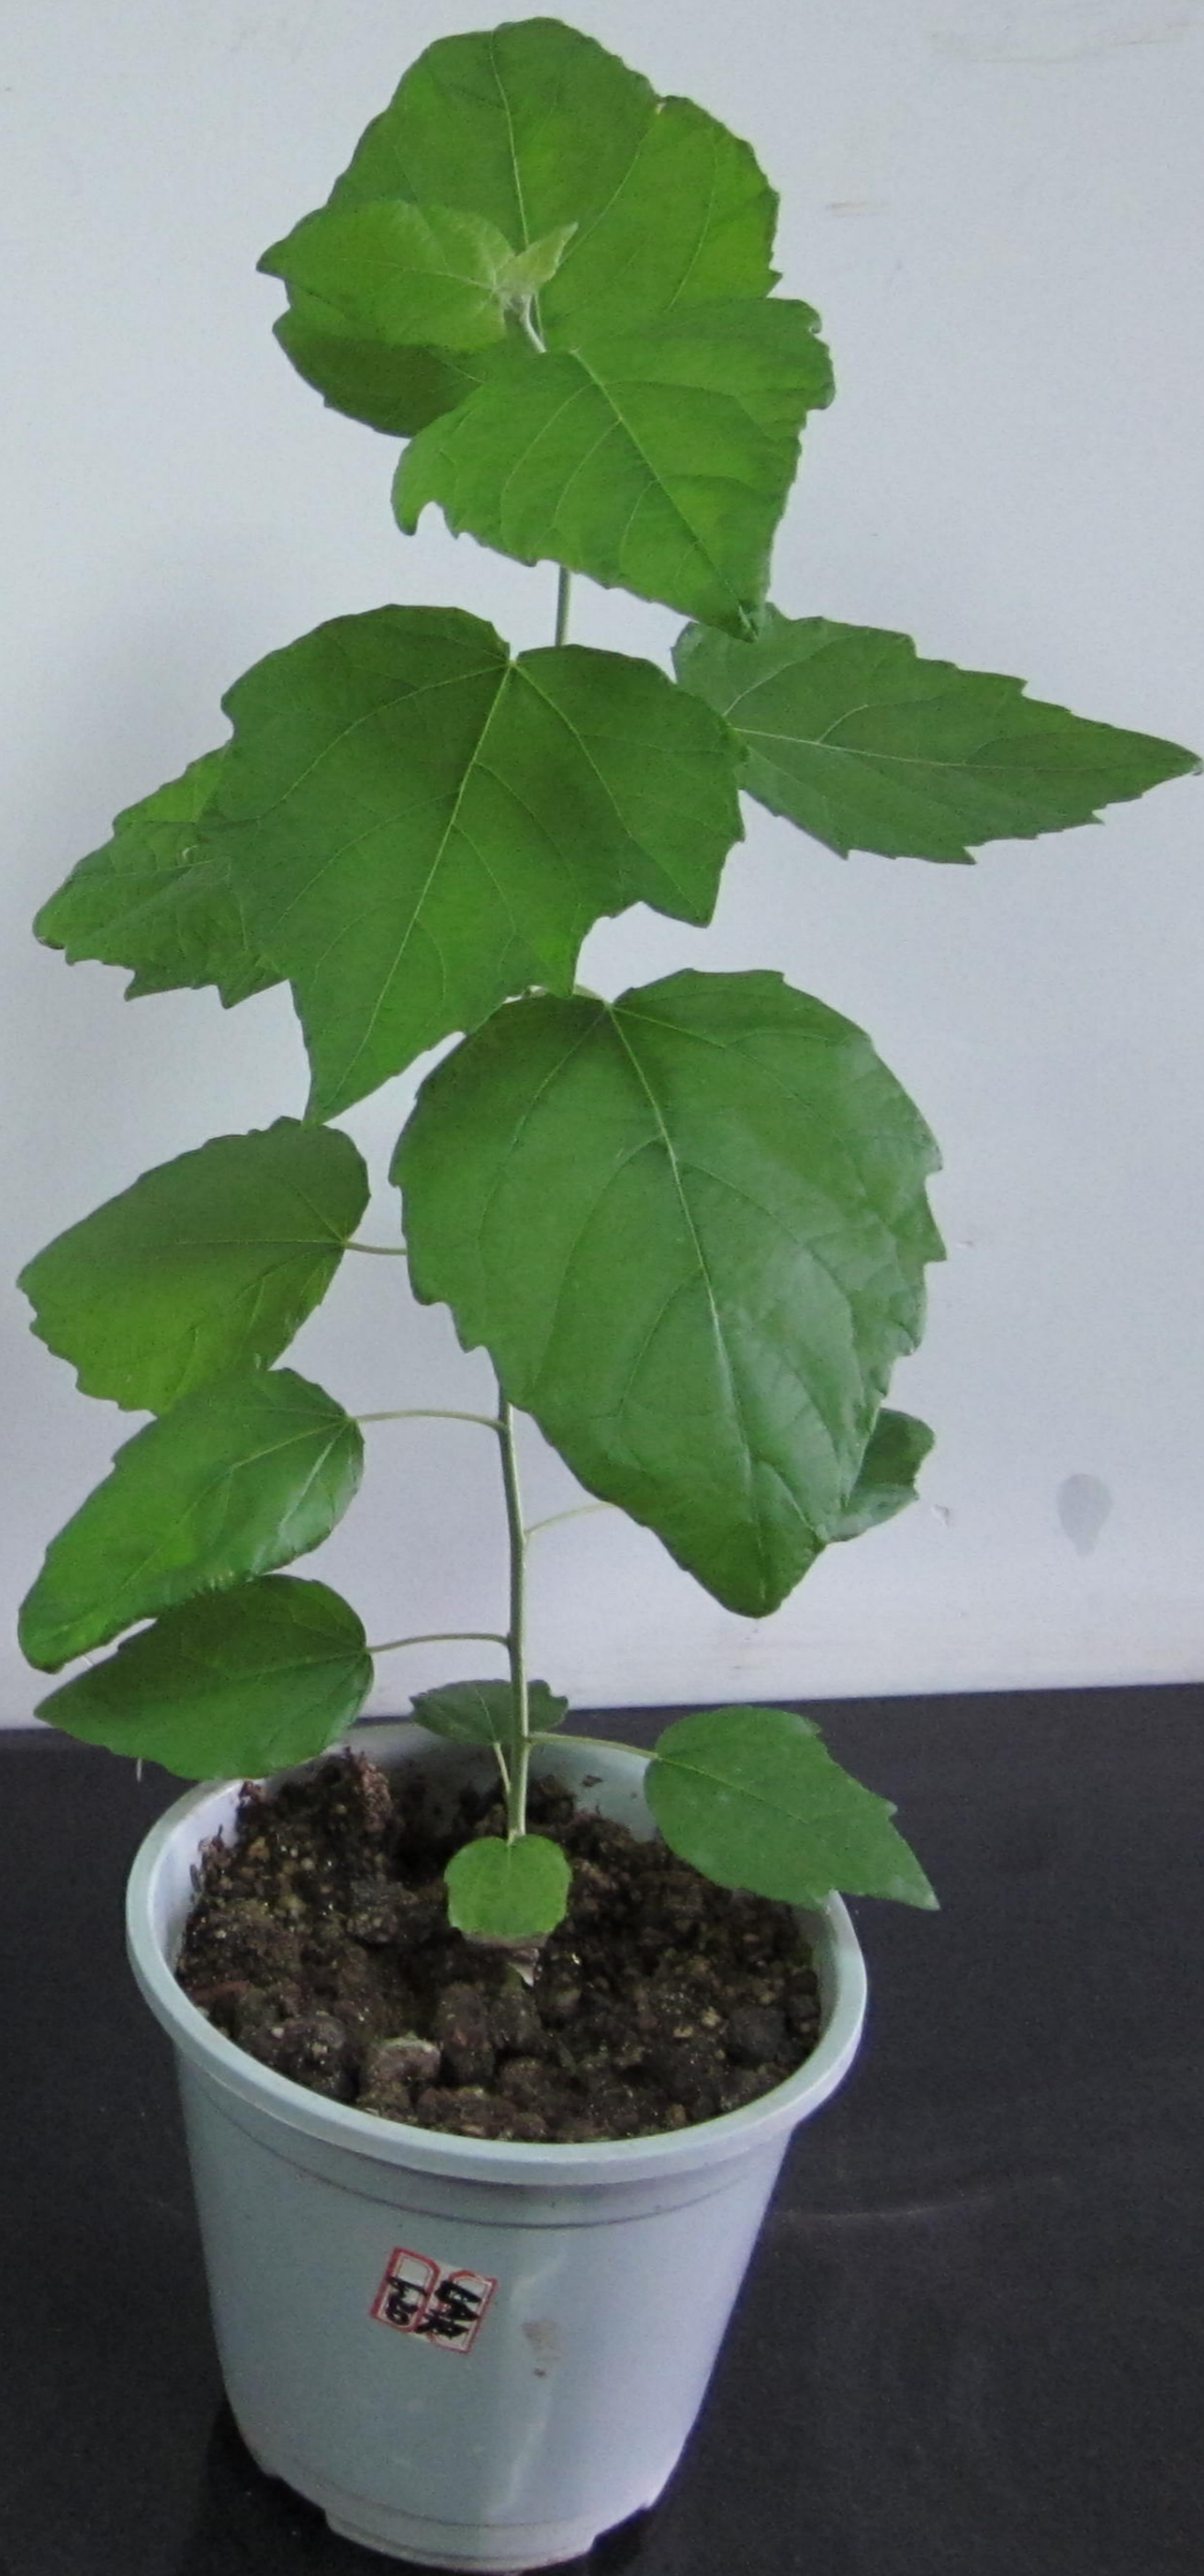

M P WT 1 2 3 4 5 6 7 8 9 10

750 bp  
500 bp

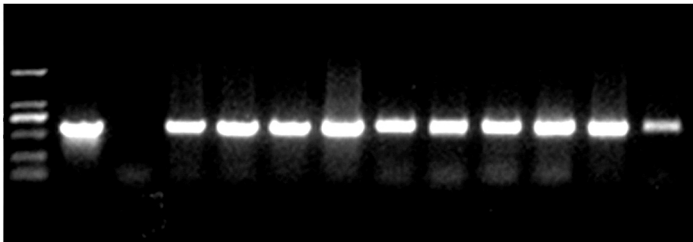

562 bp
